# Supplementary material for: Genetic connectivity between Atlantic bluefin tuna larvae spawned in the Gulf of Mexico and in the Mediterranean Sea
Source: PubMed Central journal article supplement (PMC8210807; doi:10.7717/peerj.11568), 2021-06-14
Supplement: peerj-09-11568-s002.pdf [file peerj-09-11568-s002.pdf]

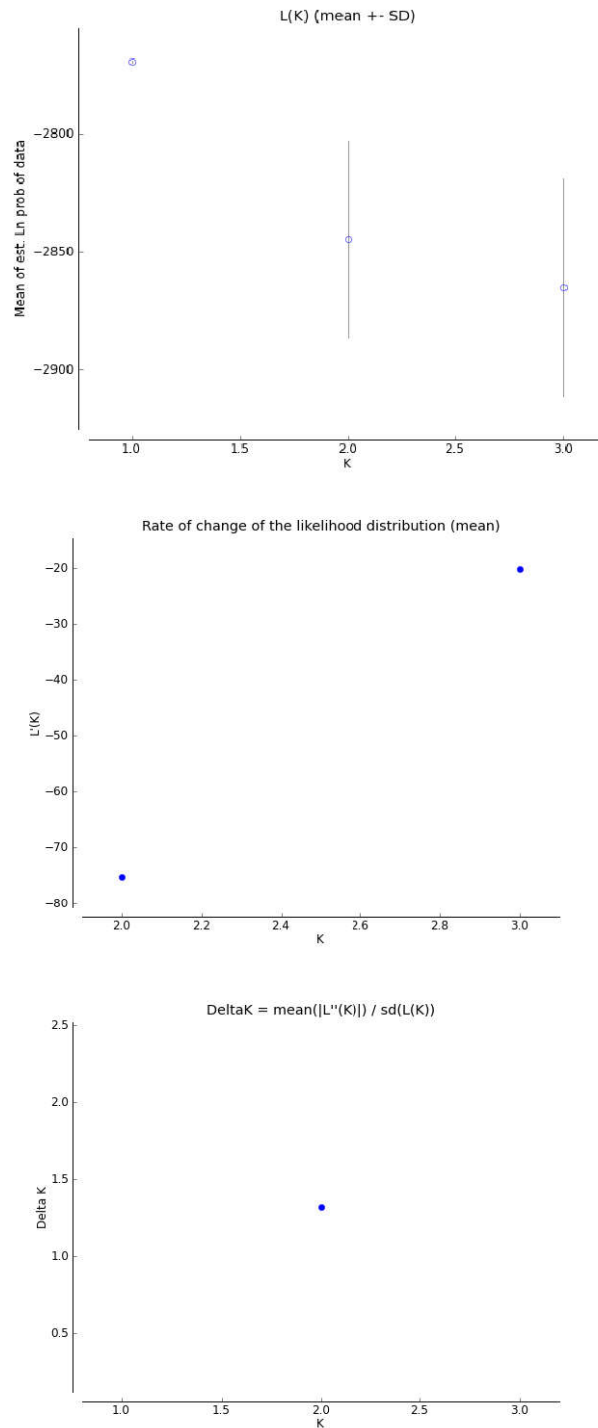

**Figure S2. Exploration of clustering through Bayesian analysis.** Plots obtained with *Structure Harvester* (Earl & vonHoldt, 2012) from all simulations performed with *STRUCTURE* v2.3.4 (Pritchard, Stephens & Donnelly, 2000) shown in Fig. 2A. The upper panel shows a plot of the mean likelihood  $L(K)$  and variance of estimated probabilities of belonging to a certain cluster per  $K$ . The right plot shows the mean difference between successive likelihood values of  $K$  ( $L'(K)$ ) used to calculate the statistic of Evanno  $K$  ( $\Delta K$ ) that is plotted in the lower panel, and can only be obtained for  $K=2$ .
